# Supplementary material for: Assessing the carbon footprint of the 15th International Coral Reef Symposium (ICRS) in Bremen, Germany
Source: PeerJ. 2025 Aug 19;13:e19811. doi: 10.7717/peerj.19811 (PMC12372782; doi:10.7717/peerj.19811)
Supplement: Supplemental Information 1 — Detailed calculations of the CO2 emissions from the categories transportation, accommodation, catering, energy, waste, and additional items. Attendee numbers and countries of residence obtained from registration lists provided by the organizers prior to the event. [file peerj-13-19811-s001.xlsx]

## Sheet: Transport
Location	average distance in km (one-way)	average distance in km both ways	Country total people		Location	average distance in km (one-way)	average distance in km both ways	Country total people
Carribean					Belgium	392	784	6
Aruba (Netherlands)	8150	16300	1		Belgium	392	784
Barbados	7400	14800	1		Belgium	392	784
Bermuda (UK)	6133	12266	1		Belgium	392	784
Cayman Islands	8244	16488	3
Cayman Islands	8244	16488
Cayman Islands	8244	16488
Curacao (Netherlands)	8112	16224	1		Belgium	392	784
St. Kitts and Nevis	7249	14498	2		Denmark	334	668	7
St. Kitts and Nevis	7249	14498			Denmark	334	668
Oceania					Denmark	334	668
Australia	14360	28720	54		Denmark	334	668
Australia	14360	28720
Australia	14360	28720
Australia	14360	28720
Australia	14360	28720			Denmark	334	668
Australia	14360	28720			Denmark	334	668
Australia	14360	28720			Denmark	334	668
Australia	14360	28720			Germany (Bremen)	0	0	29
Australia	14360	28720			Germany (Bremen)	0	0
Australia	14360	28720			Germany (Bremen)	0	0
Australia	14360	28720			Germany (Bremen)	0	0
Australia	14360	28720			Germany (Bremen)	0	0
Australia	14360	28720			Germany (Bremen)	0	0
Australia	14360	28720			Germany (Bremen)	0	0
Australia	14360	28720			Germany (Bremen)	0	0
Australia	14360	28720			Germany (Bremen)	0	0
Australia	14360	28720			Germany (Bremen)	0	0
Australia	14360	28720			Germany (Bremen)	0	0
Australia	14360	28720			Germany (Bremen)	0	0
Australia	14360	28720			Germany (Bremen)	0	0
Australia	14360	28720			Germany (Bremen)	0	0
Australia	14360	28720			Germany (Bremen)	0	0
Australia	14360	28720			Germany (Bremen)	0	0
Australia	14360	28720			Germany (Bremen)	0	0
Australia	14360	28720			Germany (Bremen)	0	0
Australia	14360	28720			Germany (Bremen)	0	0
Australia	14360	28720			Germany (Bremen)	0	0
Australia	14360	28720			Germany (Bremen)	0	0
Australia	14360	28720			Germany (Bremen)	0	0
Australia	14360	28720			Germany (Bremen)	0	0
Australia	14360	28720			Germany (Bremen)	0	0
Australia	14360	28720			Germany (Bremen)	0	0
Australia	14360	28720			Germany (Bremen)	0	0
Australia	14360	28720			Germany (Bremen)	0	0
Australia	14360	28720			Germany (Bremen)	0	0
Australia	14360	28720			Germany (Bremen)	0	0
Australia	14360	28720			Germany	210	420	34
Australia	14360	28720			Germany	210	420
Australia	14360	28720			Germany	210	420
Australia	14360	28720			Germany	210	420
Australia	14360	28720			Germany	210	420
Australia	14360	28720			Germany	210	420
Australia	14360	28720			Germany	210	420
Australia	14360	28720			Germany	210	420
Australia	14360	28720			Germany	210	420
Australia	14360	28720			Germany	210	420
Australia	14360	28720			Germany	210	420
Australia	14360	28720			Germany	210	420
Australia	14360	28720			Germany	210	420
Australia	14360	28720			Germany	210	420
Australia	14360	28720			Germany	210	420
Australia	14360	28720			Germany	210	420
Australia	14360	28720			Germany	210	420
Australia	14360	28720			Germany	210	420
Fiji	16000	32000	1		Germany	210	420
Guam (USA)	11512	23024	11		Germany	210	420
Guam (USA)	11512	23024			Germany	210	420
Guam (USA)	11512	23024			Germany	210	420
Guam (USA)	11512	23024			Germany	210	420
Guam (USA)	11512	23024			Germany	210	420
Guam (USA)	11512	23024			Germany	210	420
Guam (USA)	11512	23024			Germany	210	420
Guam (USA)	11512	23024			Germany	210	420
Guam (USA)	11512	23024			Germany	210	420
Guam (USA)	11512	23024			Germany	210	420
Guam (USA)	11512	23024			Germany	210	420
New Zealand	18305	36610	5		Germany	210	420
New Zealand	18305	36610			Germany	210	420
New Zealand	18305	36610			Germany	210	420
New Zealand	18305	36610			Germany	210	420
New Zealand	18305	36610			Netherlands	226	452	21
Palau	11579	23158	2		Netherlands	226	452
Palau	11579	23158			Netherlands	226	452
Europe					Netherlands	226	452
Austria	760	1520	4		Netherlands	226	452
Austria	760	1520			Netherlands	226	452
Austria	760	1520			Netherlands	226	452
Austria	760	1520			Netherlands	226	452
France	927	1854	25		Netherlands	226	452
France	927	1854			Netherlands	226	452
France	927	1854			Netherlands	226	452
France	927	1854			Netherlands	226	452
France	927	1854
France	927	1854			Netherlands	226	452
France	927	1854			Netherlands	226	452
France	927	1854			Netherlands	226	452
France	927	1854			Netherlands	226	452
France	927	1854			Netherlands	226	452
France	927	1854			Netherlands	226	452
France	927	1854			Netherlands	226	452
France	927	1854			Netherlands	226	452
France	927	1854			Netherlands	226	452
France	927	1854
France	927	1854			Summe	16184	32368	97
France	927	1854			Mittelwert	168.583	337.167
France	927	1854
France	927	1854				gCO2/km
France	927	1854			car (WLTP Emissions)	130.3
France	927	1854				*source: European environment Agency
France	927	1854				Monitoring of CO2 emissions from passenger cars (europa.eu) (01.05.22)
France	927	1854
France	927	1854			train	gCO2/pkm
France	927	1854				64
Italy	1177	2354	7			source: ICCT
Italy	1177	2354				The bullet train to lower-carbon travel - International Council on Clean Transportation (theicct.org)
Italy	1177	2354
Italy	1177	2354				50 % car, 50 % train
Italy	1177	2354
Italy	1177	2354
Italy	1177	2354				Total amount CO2 emission (gCO2) for 52 people travelling by car:			car:	2.28451e+06	gCO2e
Monaco	1044	2088	8			2.28451e+06				2.28451	tCO2e
Monaco	1044	2088				2.28451				#REF!	tCO2e
Monaco	1044	2088
Monaco	1044	2088				Total amount CO2 emission (gCO2) for 52 people travelling by train:
Monaco	1044	2088				1.12209e+06
Monaco	1044	2088				Total amount CO2 emission (tCO2) for 52 people travelling by train:
Monaco	1044	2088				1.12209
Monaco	1044	2088
Norway	995	1990	4
Norway	995	1990
Norway	995	1990
Norway	995	1990
Poland	766	1532	1
Portugal	1965	3930	1
Spain	1747	3494	9
Spain	1747	3494
Spain	1747	3494
Spain	1747	3494
Spain	1747	3494
Spain	1747	3494
Spain	1747	3494
Spain	1747	3494
Spain	1747	3494
Sweden	1058	2116	5
Sweden	1058	2116
Sweden	1058	2116
Sweden	1058	2116
Sweden	1058	2116
Switzerland	678	1356	5
Switzerland	678	1356
Switzerland	678	1356
Switzerland	678	1356
Switzerland	678	1356
UK	775	1550	82
UK	775	1550
UK	775	1550
UK	775	1550
UK	775	1550
UK	775	1550
UK	775	1550
UK	775	1550
UK	775	1550
UK	775	1550
UK	775	1550
UK	775	1550
UK	775	1550
UK	775	1550
UK	775	1550
UK	775	1550
UK	775	1550
UK	775	1550
UK	775	1550
UK	775	1550
UK	775	1550
UK	775	1550
UK	775	1550
UK	775	1550
UK	775	1550
UK	775	1550
UK	775	1550
UK	775	1550
UK	775	1550
UK	775	1550
UK	775	1550
UK	775	1550
UK	775	1550
UK	775	1550
UK	775	1550
UK	775	1550
UK	775	1550
UK	775	1550
UK	775	1550
UK	775	1550
UK	775	1550
UK	775	1550
UK	775	1550
UK	775	1550
UK	775	1550
UK	775	1550
UK	775	1550
UK	775	1550
UK	775	1550
UK	775	1550
UK	775	1550
UK	775	1550
UK	775	1550
UK	775	1550
UK	775	1550
UK	775	1550
UK	775	1550
UK	775	1550
UK	775	1550
UK	775	1550
UK	775	1550
UK	775	1550
UK	775	1550
UK	775	1550
UK	775	1550
UK	775	1550
UK	775	1550
UK	775	1550
UK	775	1550
UK	775	1550
UK	775	1550
UK	775	1550
UK	775	1550
UK	775	1550
UK	775	1550
UK	775	1550
UK	775	1550
UK	775	1550
UK	775	1550
UK	775	1550
UK	775	1550
UK	775	1550
South America
Brazil	9226	18452	9
Brazil	9226	18452
Brazil	9226	18452
Brazil	9226	18452
Brazil	9226	18452
Brazil	9226	18452
Brazil	9226	18452
Brazil	9226	18452
Brazil	9226	18452
Chile	12000	24000	1
Colombia	9122	18244	4
Colombia	9122	18244
Colombia	9122	18244
Colombia	9122	18244
Costa Rica	9312	18624	1
Guatemala	9225	18450	1
Panama	9129	18258	3
Panama	9129	18258
Panama	9129	18258
Asia
Cambodia	5755	11510	1
Hong Kong	8997	17994	8
Hong Kong	8997	17994
Hong Kong	8997	17994
Hong Kong	8997	17994
Hong Kong	8997	17994
Hong Kong	8997	17994
Hong Kong	8997	17994
Hong Kong	8997	17994
Indonesia	11856	23712	6
Indonesia	11856	23712
Indonesia	11856	23712
Indonesia	11856	23712
Indonesia	11856	23712
Indonesia	11856	23712
Israel	3176	6352	26
Israel	3176	6352
Israel	3176	6352
Israel	3176	6352
Israel	3176	6352
Israel	3176	6352
Israel	3176	6352
Israel	3176	6352
Israel	3176	6352
Israel	3176	6352
Israel	3176	6352
Israel	3176	6352
Israel	3176	6352
Israel	3176	6352
Israel	3176	6352
Israel	3176	6352
Israel	3176	6352
Israel	3176	6352
Israel	3176	6352
Israel	3176	6352
Israel	3176	6352
Israel	3176	6352
Israel	3176	6352
Israel	3176	6352
Israel	3176	6352
Israel	3176	6352
Japan	9070	18140	8
Japan	9070	18140
Japan	9070	18140
Japan	9070	18140
Japan	9070	18140
Japan	9070	18140
Japan	9070	18140
Japan	9070	18140
Malaysia	10692	21384	2
Malaysia	10692	21384
Maldives	8028	16056	1
Philippines	10331	20662	1
Qatar	4659	9318	9
Qatar	4659	9318
Qatar	4659	9318
Qatar	4659	9318
Qatar	4659	9318
Qatar	4659	9318
Qatar	4659	9318
Qatar	4659	9318
Qatar	4659	9318
Saudi Arabia	4335	8670	65
Saudi Arabia	4335	8670
Saudi Arabia	4335	8670
Saudi Arabia	4335	8670
Saudi Arabia	4335	8670
Saudi Arabia	4335	8670
Saudi Arabia	4335	8670
Saudi Arabia	4335	8670
Saudi Arabia	4335	8670
Saudi Arabia	4335	8670
Saudi Arabia	4335	8670
Saudi Arabia	4335	8670
Saudi Arabia	4335	8670
Saudi Arabia	4335	8670
Saudi Arabia	4335	8670
Saudi Arabia	4335	8670
Saudi Arabia	4335	8670
Saudi Arabia	4335	8670
Saudi Arabia	4335	8670
Saudi Arabia	4335	8670
Saudi Arabia	4335	8670
Saudi Arabia	4335	8670
Saudi Arabia	4335	8670
Saudi Arabia	4335	8670
Saudi Arabia	4335	8670
Saudi Arabia	4335	8670
Saudi Arabia	4335	8670
Saudi Arabia	4335	8670
Saudi Arabia	4335	8670
Saudi Arabia	4335	8670
Saudi Arabia	4335	8670
Saudi Arabia	4335	8670
Saudi Arabia	4335	8670
Saudi Arabia	4335	8670
Saudi Arabia	4335	8670
Saudi Arabia	4335	8670
Saudi Arabia	4335	8670
Saudi Arabia	4335	8670
Saudi Arabia	4335	8670
Saudi Arabia	4335	8670
Saudi Arabia	4335	8670
Saudi Arabia	4335	8670
Saudi Arabia	4335	8670
Saudi Arabia	4335	8670
Saudi Arabia	4335	8670
Saudi Arabia	4335	8670
Saudi Arabia	4335	8670
Saudi Arabia	4335	8670
Saudi Arabia	4335	8670
Saudi Arabia	4335	8670
Saudi Arabia	4335	8670
Saudi Arabia	4335	8670
Saudi Arabia	4335	8670
Saudi Arabia	4335	8670
Saudi Arabia	4335	8670
Saudi Arabia	4335	8670
Saudi Arabia	4335	8670
Saudi Arabia	4335	8670
Saudi Arabia	4335	8670
Saudi Arabia	4335	8670
Saudi Arabia	4335	8670
Saudi Arabia	4335	8670
Saudi Arabia	4335	8670
Saudi Arabia	4335	8670
Saudi Arabia	4335	8670
Singapore	10229	20458	4
Singapore	10229	20458
Singapore	10229	20458
Singapore	10229	20458
South Korea	8508	17016	2
South Korea	8508	17016
Sri Lanka	8108	16216	1
Taiwan	9255	18510	3
Taiwan	9255	18510
Taiwan	9255	18510
Thailand	8780	17560	1
UAE	5013	10026	2
UAE	5013	10026
North America
Canada	6430	12860	11
Canada	6430	12860
Canada	6430	12860
Canada	6430	12860
Canada	6430	12860
Canada	6430	12860
Canada	6430	12860
Canada	6430	12860
Canada	6430	12860
Canada	6430	12860
Canada	6430	12860
Guatemala	9225	18450	1
Mexico	9267	18534	13
Mexico	9267	18534
Mexico	9267	18534
Mexico	9267	18534
Mexico	9267	18534
Mexico	9267	18534
Mexico	9267	18534
Mexico	9267	18534
Mexico	9267	18534
Mexico	9267	18534
Mexico	9267	18534
Mexico	9267	18534
Mexico	9267	18534
Puerto Rico	7429	14858	1
USA	7566	15132	345
USA	7566	15132
USA	7566	15132
USA	7566	15132
USA	7566	15132
USA	7566	15132
USA	7566	15132
USA	7566	15132
USA	7566	15132
USA	7566	15132
USA	7566	15132
USA	7566	15132
USA	7566	15132
USA	7566	15132
USA	7566	15132
USA	7566	15132
USA	7566	15132
USA	7566	15132
USA	7566	15132
USA	7566	15132
USA	7566	15132
USA	7566	15132
USA	7566	15132
USA	7566	15132
USA	7566	15132
USA	7566	15132
USA	7566	15132
USA	7566	15132
USA	7566	15132
USA	7566	15132
USA	7566	15132
USA	7566	15132
USA	7566	15132
USA	7566	15132
USA	7566	15132
USA	7566	15132
USA	7566	15132
USA	7566	15132
USA	7566	15132
USA	7566	15132
USA	7566	15132
USA	7566	15132
USA	7566	15132
USA	7566	15132
USA	7566	15132
USA	7566	15132
USA	7566	15132
USA	7566	15132
USA	7566	15132
USA	7566	15132
USA	7566	15132
USA	7566	15132
USA	7566	15132
USA	7566	15132
USA	7566	15132
USA	7566	15132
USA	7566	15132
USA	7566	15132
USA	7566	15132
USA	7566	15132
USA	7566	15132
USA	7566	15132
USA	7566	15132
USA	7566	15132
USA	7566	15132
USA	7566	15132
USA	7566	15132
USA	7566	15132
USA	7566	15132
USA	7566	15132
USA	7566	15132
USA	7566	15132
USA	7566	15132
USA	7566	15132
USA	7566	15132
USA	7566	15132
USA	7566	15132
USA	7566	15132
USA	7566	15132
USA	7566	15132
USA	7566	15132
USA	7566	15132
USA	7566	15132
USA	7566	15132
USA	7566	15132
USA	7566	15132
USA	7566	15132
USA	7566	15132
USA	7566	15132
USA	7566	15132
USA	7566	15132
USA	7566	15132
USA	7566	15132
USA	7566	15132
USA	7566	15132
USA	7566	15132
USA	7566	15132
USA	7566	15132
USA	7566	15132
USA	7566	15132
USA	7566	15132
USA	7566	15132
USA	7566	15132
USA	7566	15132
USA	7566	15132
USA	7566	15132
USA	7566	15132
USA	7566	15132
USA	7566	15132
USA	7566	15132
USA	7566	15132
USA	7566	15132
USA	7566	15132
USA	7566	15132
USA	7566	15132
USA	7566	15132
USA	7566	15132
USA	7566	15132
USA	7566	15132
USA	7566	15132
USA	7566	15132
USA	7566	15132
USA	7566	15132
USA	7566	15132
USA	7566	15132
USA	7566	15132
USA	7566	15132
USA	7566	15132
USA	7566	15132
USA	7566	15132
USA	7566	15132
USA	7566	15132
USA	7566	15132
USA	7566	15132
USA	7566	15132
USA	7566	15132
USA	7566	15132
USA	7566	15132
USA	7566	15132
USA	7566	15132
USA	7566	15132
USA	7566	15132
USA	7566	15132
USA	7566	15132
USA	7566	15132
USA	7566	15132
USA	7566	15132
USA	7566	15132
USA	7566	15132
USA	7566	15132
USA	7566	15132
USA	7566	15132
USA	7566	15132
USA	7566	15132
USA	7566	15132
USA	7566	15132
USA	7566	15132
USA	7566	15132
USA	7566	15132
USA	7566	15132
USA	7566	15132
USA	7566	15132
USA	7566	15132
USA	7566	15132
USA	7566	15132
USA	7566	15132
USA	7566	15132
USA	7566	15132
USA	7566	15132
USA	7566	15132
USA	7566	15132
USA	7566	15132
USA	7566	15132
USA	7566	15132
USA	7566	15132
USA	7566	15132
USA	7566	15132
USA	7566	15132
USA	7566	15132
USA	7566	15132
USA	7566	15132
USA	7566	15132
USA	7566	15132
USA	7566	15132
USA	7566	15132
USA	7566	15132
USA	7566	15132
USA	7566	15132
USA	7566	15132
USA	7566	15132
USA	7566	15132
USA	7566	15132
USA	7566	15132
USA	7566	15132
USA	7566	15132
USA	7566	15132
USA	7566	15132
USA	7566	15132
USA	7566	15132
USA	7566	15132
USA	7566	15132
USA	7566	15132
USA	7566	15132
USA	7566	15132
USA	7566	15132
USA	7566	15132
USA	7566	15132
USA	7566	15132
USA	7566	15132
USA	7566	15132
USA	7566	15132
USA	7566	15132
USA	7566	15132
USA	7566	15132
USA	7566	15132
USA	7566	15132
USA	7566	15132
USA	7566	15132
USA	7566	15132
USA	7566	15132
USA	7566	15132
USA	7566	15132
USA	7566	15132
USA	7566	15132
USA	7566	15132
USA	7566	15132
USA	7566	15132
USA	7566	15132
USA	7566	15132
USA	7566	15132
USA	7566	15132
USA	7566	15132
USA	7566	15132
USA	7566	15132
USA	7566	15132
USA	7566	15132
USA	7566	15132
USA	7566	15132
USA	7566	15132
USA	7566	15132
USA	7566	15132
USA	7566	15132
USA	7566	15132
USA	7566	15132
USA	7566	15132
USA	7566	15132
USA	7566	15132
USA	7566	15132
USA	7566	15132
USA	7566	15132
USA	7566	15132
USA	7566	15132
USA	7566	15132
USA	7566	15132
USA	7566	15132
USA	7566	15132
USA	7566	15132
USA	7566	15132
USA	7566	15132
USA	7566	15132
USA	7566	15132
USA	7566	15132
USA	7566	15132
USA	7566	15132
USA	7566	15132
USA	7566	15132
USA	7566	15132
USA	7566	15132
USA	7566	15132
USA	7566	15132
USA	7566	15132
USA	7566	15132
USA	7566	15132
USA	7566	15132
USA	7566	15132
USA	7566	15132
USA	7566	15132
USA	7566	15132
USA	7566	15132
USA	7566	15132
USA	7566	15132
USA	7566	15132
USA	7566	15132
USA	7566	15132
USA	7566	15132
USA	7566	15132
USA	7566	15132
USA	7566	15132
USA	7566	15132
USA	7566	15132
USA	7566	15132
USA	7566	15132
USA	7566	15132
USA	7566	15132
USA	7566	15132
USA	7566	15132
USA	7566	15132
USA	7566	15132
USA	7566	15132
USA	7566	15132
USA	7566	15132
USA	7566	15132
USA	7566	15132
USA	7566	15132
USA	7566	15132
USA	7566	15132
USA	7566	15132
USA	7566	15132
USA	7566	15132
USA	7566	15132
USA	7566	15132
USA	7566	15132
USA	7566	15132
USA	7566	15132
USA	7566	15132
USA	7566	15132
USA	7566	15132
USA	7566	15132
USA	7566	15132
USA	7566	15132
USA	7566	15132
USA	7566	15132
USA	7566	15132
USA	7566	15132
USA	7566	15132
USA	7566	15132
USA	7566	15132
USA	7566	15132
USA	7566	15132
USA	7566	15132
USA	7566	15132
USA	7566	15132
USA	7566	15132
USA	7566	15132
USA	7566	15132
USA	7566	15132
USA	7566	15132
USA	7566	15132
USA	7566	15132
USA	7566	15132
USA	7566	15132
USA	7566	15132
USA	7566	15132
USA	7566	15132
USA	7566	15132
Virgin Islands	7306	14612	6
Virgin Islands	7306	14612
Virgin Islands	7306	14612
Virgin Islands	7306	14612
Virgin Islands	7306	14612
Virgin Islands	7306	14612
Africa
Kenya	6386	12772	3
Kenya	6386	12772
Kenya	6386	12772
La Reunion (France)	9394	18788	1
Morocco	2627	5254	2
Morocco	2627	5254
Mozambique	8321	16642	1
Sudan	4519	9038	4
Sudan	4519	9038
Sudan	4519	9038
Sudan	4519	9038
Sum	5118923	10237846	780
Mean	6562.72	13125.4
	Avg. CO2 Emission (g/RPK)	distance one way (km)												%	absolute
Airplane	101.3	>500			Total CO2-emissions for all attendees caused by travel in tCO2 for 911 in-person participants:					final number of participants relative to old number of participants (1052 vs 911				109.469	1.09469
	*Source: https://www.epa.gov/system/files/documents/2022-04/ghg_emission_factors_hub.pdf				1041.16
					assumptions:
	Total CO2-Emissions (g) aviation for 1 Person both ways:				distances > 500 km travelled by airplane
	1.32961e+06				distances < 500 km: 50 % travelled by train, 50 % travelled by car					Final total CO2-emission for all attendees by travel in tCO2 for 1052, assuming the mean travel distance from previous calculations for all late registered participants
	Total CO2-Emissions (kg) aviation for 1 Person both ways:									1139.75
	1329.61
	Total CO2-Emissions (kg) aviation for 780 People both ways:									Emissions for 141 late-registered participants
	1.03709e+06									98.591
	Total CO2-Emissions (t) aviation for 780 People both ways:
	1037.09
	source for distances:	source for Aviation CO2 emission:
	https://www.distance.to/	https://www.epa.gov/system/files/documents/2022-04/ghg_emission_factors_hub.pdf
Attendees with travel distance < 500 km
Location	average distance in km (one-way)	average distance in km both ways	Country total people
Belgium	392	784	6
Belgium	392	784
Belgium	392	784
Belgium	392	784
Belgium	392	784
Belgium	392	784
Denmark	334	668	7
Denmark	334	668
Denmark	334	668
Denmark	334	668
Denmark	334	668
Denmark	334	668
Denmark	334	668
Germany (Bremen)	0	0	42
Germany (Bremen)	0	0
Germany (Bremen)	0	0
Germany (Bremen)	0	0
Germany (Bremen)	0	0
Germany (Bremen)	0	0
Germany (Bremen)	0	0
Germany (Bremen)	0	0
Germany (Bremen)	0	0
Germany (Bremen)	0	0
Germany (Bremen)	0	0
Germany (Bremen)	0	0
Germany (Bremen)	0	0
Germany (Bremen)	0	0
Germany (Bremen)	0	0
Germany (Bremen)	0	0
Germany (Bremen)	0	0
Germany (Bremen)	0	0
Germany (Bremen)	0	0
Germany (Bremen)	0	0
Germany (Bremen)	0	0
Germany (Bremen)	0	0
Germany (Bremen)	0	0
Germany (Bremen)	0	0
Germany (Bremen)	0	0
Germany (Bremen)	0	0
Germany (Bremen)	0	0
Germany (Bremen)	0	0
Germany (Bremen)	0	0
Germany (Bremen)	0	0
Germany (Bremen)	0	0
Germany (Bremen)	0	0
Germany (Bremen)	0	0
Germany (Bremen)	0	0
Germany (Bremen)	0	0
Germany (Bremen)	0	0
Germany (Bremen)	0	0
Germany (Bremen)	0	0
Germany (Bremen)	0	0
Germany (Bremen)	0	0
Germany (Bremen)	0	0
Germany (Bremen)	0	0
Germany	210	420	54
Germany	210	420
Germany	210	420
Germany	210	420
Germany	210	420
Germany	210	420
Germany	210	420
Germany	210	420
Germany	210	420
Germany	210	420
Germany	210	420
Germany	210	420
Germany	210	420
Germany	210	420
Germany	210	420
Germany	210	420
Germany	210	420
Germany	210	420
Germany	210	420
Germany	210	420
Germany	210	420
Germany	210	420
Germany	210	420
Germany	210	420
Germany	210	420
Germany	210	420
Germany	210	420
Germany	210	420
Germany	210	420
Germany	210	420
Germany	210	420
Germany	210	420
Germany	210	420
Germany	210	420
Germany	210	420
Germany	210	420
Germany	210	420
Germany	210	420
Germany	210	420
Germany	210	420
Germany	210	420
Germany	210	420
Germany	210	420
Germany	210	420
Germany	210	420
Germany	210	420
Germany	210	420
Germany	210	420
Germany	210	420
Germany	210	420
Germany	210	420
Germany	210	420
Germany	210	420
Germany	210	420
Netherlands	226	452	22
Netherlands	226	452
Netherlands	226	452
Netherlands	226	452
Netherlands	226	452
Netherlands	226	452
Netherlands	226	452
Netherlands	226	452
Netherlands	226	452
Netherlands	226	452
Netherlands	226	452
Netherlands	226	452
Netherlands	226	452
Netherlands	226	452
Netherlands	226	452
Netherlands	226	452
Netherlands	226	452
Netherlands	226	452
Netherlands	226	452
Netherlands	226	452
Netherlands	226	452
Netherlands	226	452
Sum	21002	42004	131
Mean	160.321	320.641
	gCO2/km
car (WLTP Emissions)	130.3
	*source: European environment Agency
	Monitoring of CO2 emissions from passenger cars (europa.eu) (01.05.22)
train	gCO2/pkm
	64
	source: ICCT
	The bullet train to lower-carbon travel - International Council on Clean Transportation (theicct.org)
	50 % car, 50 % train
	Total amount CO2 emission (gCO2) for 65 people travelling by car:			car:	2.71567e+06	gCO2e
	2.71567e+06				2.71567	tCO2e
	Total amount CO2 emission (tCO2) for 65 people travelling by car:			train:	1.35439e+06	gCO2e
	2.71567				1.35439	tCO2e
	Total amount CO2 emission (gCO2) for 66 people travelling by train:
	1.35439e+06
	Total amount CO2 emission (tCO2) for 66 people travelling by train:
	1.35439
people total	911

## Sheet: Catering
Attendees		average meals sizes				Number of meals per person
1002	visitors	lunch and dinner:				5	lunches	6
50	volunteers and Orga	500	g			1	dinner
		in parts:				1	Ice-Breaker
		200	g	Rice or Potatoes		10	Coffee-Breaks
		200	g	Veggies
		100	g	cheese or eggs
						emission factors		kgCO2/kg or l	average per category	*source:https://ourworldindata.org/environmental-impacts-of-food
		Ice-Breaker				rice		4.45	2.455
		2	Beer or wine			potatoes		0.46
		kgCO2e emissions for each meal:				vegetables		0.98
		2.1144				cheese		23.88	14.274
						eggs		4.67
per person:						milk		3.15
CO2e emissions per person for food and drinks			Total:			soy milk		0.98
what	amount	kgCO2e	meals:	kgCO2e	tCO2e	beer		0.28		(0,5 kgCO2e / pint)	*source: https://www.theguardian.com/environment/green-living-blog/2010/jun/04/carbon-footprint-beer?msclkid=b14b1ebfcd5011ecaceb96a2fb39ff72
meals	6	12.6864	6312	13346.1	13.3461	wine		1.79
Ice breaker drinks	2 (1 wine and 1 beer)	0.5875	1052*2	618.05	0.61805	coffee/tea		28.53
coffee	10	71.325	1052*10	75033.9	75.0339
milk for coffee	10	1.575	1052*10	1656.9	1.6569	beer	0,5 l	0.14	0.29375
*normal milk, not Soy					0	wine	0,25 l	0.4475
	total	86.1739		90654.9	90.6549	coffee	0,25 l	7.1325
						milk for 1 coffee	0,05 l	0.1575
Total people:	1002	attendees				soymilk for 1 coffee	0,05 l	0.049
	50	Org + volunteers
	1052
Total CO2e emissions (kgCO2e) for catering + drinks (except for water)
90654.9
Total CO2e emissions (tCO2e) for catering + drinks (except for water)
90.6549
Emissions for Catering including water:
Total CO2e emissions (kgCO2e) for catering + drinks (except for water)				Estimated CO emissions from glass bottles in t
90.6549				3.52683
Total catering emissions for 1052 In-Perosn attendees (tCO2e):
94.1818

## Sheet: Water Use
Water sanitary use	https://www.bmuv.de/themen/wasser-ressourcen-abfall/binnengewaesser/verbrauchertipps/wassersparende-toilettenspuelung#:~:text=Hier%20besteht%20ein%20gro%C3%9Fes%20Einsparpotential,auf%203%20Liter%20reduziert%20werden.
	ca. 6l per flush as mean
	https://www.greenmatters.com/p/water-conservation-hand-washing
	ca. 2l for handwashing 30 secs
Calculation water consumption and sewage from sanitary use
Attendees	1002		Estimated WC use per person plus washing hands for 30s Icebreaker	Estimated WC use per person plus washing hands for 30s per full day conference day		Estimated WC uses/handwashing Icebreaker	Estimated WC uses/handwashing per full conference day total
Volunteers and Orga	50		1	3		1052	3156
Persons in total	1052
			Average water consumption per WC flush and hand wash handwashing in l	Total water consumption WC/ handwashing in l per full conference day per full conference day		Total water consumption WC/ handwashing in l Icebreaker
			8	25248		8416
Conference days	Icebreaker	Full days
	1	5
Estimated water consumption from sanitary use in l	8416	126240
Total estimated water consumption from sanitary use (L) use full conference in l		134656	Total estimated water consumption from sanitary m³ use full conference in m³	134.656
Total estimated sewage from sanitary use in L		134656	Total estimated sewage from sanitary use in m³	134.656
Average electricity consumption for provision per m³ tapwater in kw/h
0.51		https://www.umweltbundesamt.de/sites/default/files/medien/479/publikationen/hgp_wassersparen_in_privathaushalten_web.pdf
Average CO2 emissions per kw/h in kg		https://www.umweltbundesamt.de/en/press/pressinformation/co2-emissions-per-kilowatt-hour-of-electricity-in
0.468
Total estimated CO2 emissions for provision of estimated water consumption from sanitary use in kg		Total estimated CO2 emissions for provision of estimated water consumption from sanitary use in t
	32.1397		0.0321397
Average GHG emission factor (CO2/m³) wastewater in germany in kg				https://reader.elsevier.com/reader/sd/pii/S0306261916310029?token=C2B5CF978DF559ACAE3768E0187F91BB95006FA99844FE62E653D02C43D8305B4C7599B484487EAD4ACD6368C2CD3000&originRegion=eu-west-1&originCreation=20220604201617
0.29
Total estimated CO2 emissions for sewage from sanitary use in kg		Total estimated CO2 emissions for sewage from sanitary use in t
	39.0502		0.0390502
Human water needs	https://watermark.silverchair.com/nutritionreviews63-s030.pdf?token=AQECAHi208BE49Ooan9kkhW_Ercy7Dm3ZL_9Cf3qfKAc485ysgAAAwwwggMIBgkqhkiG9w0BBwagggL5MIIC9QIBADCCAu4GCSqGSIb3DQEHATAeBglghkgBZQMEAS4wEQQMdutk5dqgqeg0tbWAAgEQgIICv_9li35EOyrPbO7f5a6Df572lOe4fQ4zRmDkm-xlPs1gg01YD1N4jDS6Zk_4ADlva0mGnfZ7ginLtjRlxIbvWHUM4KB8Vc81JJm_VJSc0tMTYFTLoDnPyeX-hgVUA0EOYdIs9A8sWCNIoF78D_cZ-xjAMjNwlnaCIL_YHou7DUBVxYE…
Calculation drinking water consumption on full conference days
Attendees	1002			Estimated drinking water per attendee consumed per full conference day in l		Total estimated drinking water consumption per attendee in l
Volunteers and Orga	50			1.5		7.5
Persons in total	1052
Total estimated drinking water consumption in l		7890
Bottle material (1,5l Volume)	CO2 emissions in kg per bottle		Estimated CO emissions from PET bottles in kg	Estimated CO emissions from PET bottles in t		Estimated CO emissions from glass bottles in kg	Estimated CO emissions from glass bottles in t
Glass	0.323		2548.47	2.54847		3526.83	3.52683
PET	0.447

## Sheet: Hotel-PubTrans + online + add.
	attendees staying in hotels	Estimated overnight stays per attendee	overnight stays total	star category	CO2e kg/overnight stay
Attendees in person (incl. Team)	1052	5	4690	0-2	24.7
Attendees Bremen (incl. Team)	114			3	16.9
Attendees in hotels	938			4	21
				5	47.6
						Quelle: DEHOGA Umweltbroschüre
			CO2e emissions total 3* in kg - new participant number			https://www.dehoga-bundesverband.de/fileadmin/Startseite/05_Themen/Energie/DEHOGA_Umweltbroschu__re_Oktober_2016.pdf
			79261	D2*F3
			CO2e emissions total 3* in t
			79.261
Transportation with public transport during conference week
estimation: 25 % of attendees reside in a hotel that´s not in walking distance (< 1 km) from the conference location						263	attendees	and	50	volunteers/organizers
average distance of those hotels from the conference location:			3.6	km
distance both ways:			7.2	km
conference days:			5
total distance for each attendee:			36	km
global average emission factor:			0.1	kg CO2 / passenger-km		*source: Verband deutsches Reisemanagement e.V.
	Total amount of kgCO2 caused by public transport to and from the conference location:
	1126.8
	Total amount of tCO2 caused by public transport to and from the conference location:
	1.1268
Transportation from/to airport
All attendees except for people from Bremen and people who arrive by train or car			921	attendees
assumption: most hotels are near the conference center, so that is the median distance			4.2	km	one way
total distance for each attendee			8.4	km	two ways
	Total amount of kgCO2 caused by public transport to and from the airport:
	773.64
	Total amount of tCO2 caused by public transport to and from the airport:
	0.77364
Total emissions from public transport in tCO2e
1.90044
CO2e emissions by online attendees
Attendees	Amount of Co2e per attendee
198	10	kg
Total CO2e emissions fron online attendees
1980	kg
1.98	t
Production of Shirts
amount of shirts:	kgCO2e per shirt		total amount CO2e
527	8.3		4374.1	kg
	*source: https://textclothsustain.springeropen.com/track/pdf/10.1186/s40689-015-0008-8.pdf		4.3741	tCO2e
Print for conference passes and key chains
estimated Number of conference passes:		1000
CO2 emissions per printed page:		0.006	kgCO2e	source: https://www.ezeep.com/de/co2-neutral-drucken/
assumptions: emissions for production of 1 paper page:		0.005	kgCo2e
	emission for printing of 1 page:	0.001	kgCo2e
Total emissions for printes conference passes:
6	kgCO2e
0.006	tCO2e
assumption for keychains:
0.019	kg weight		Lanyard - als bedruckbarer Werbeartikel - WERBEARTIKEL (muenchen-werbeartikel.de)
1000	lanyards	Gesamtgewicht:	19	kg
2.7	kgCO2e per kg		https://www.weprintlanyards.com/blog/eco-friendly-lanyards.aspx
total CO2 emissions for lanyards
51.3	kgCO2e
0.0513	tCO2e

## Sheet: Waste
	https://recyclingworksma.com/food-waste-estimation-guide/#SourcesForBusinessSectorEstimates
	https://www.statistik-bw.de/Service/Veroeff/Monatshefte/PDF/Beitrag10_06_01.pdf						ca. 80 kg CO2e per t Bio-waste
	https://www.itad.de/wissen/faktenblaetter/hintergrundinformationen-nach-behg#:~:text=EBS%20mit%20einem%20Heiz%2D%20wert,2.046%20g%20CO2%2Fkg%20verursachen.&text=In%20jedem%20Kilogramm%20Restm%C3%BCll%20sind%20220%20g%20vorwiegend%20organisch%20gebundener%20Kohlenstoff%20enthalten.
							ca. 500g CO2/kg householdwaste
Household waste
Amount of meals:	6312
Mass per meal in kg:	0.5
kg for meals total:	3156
Estimated waste in kg per meal:	0.15
Estimated waste total for meals in kg:	473.4
Napkins (1 per attendee per meal):	5766
Napkins (1 per attendee per coffe break):	9610
Napkins total:	15376
Estimated weight per napkin in kg:	0.004
Estimated waste for napkins in kg:	61.504
			Estimated CO2 emissions per kg household waste in kg		0.5
Household waste total in kg:	534.904		Estimated CO2 emissions household waste total in kg		267.452
			Estimated CO2 emissions household waste total in t		0.267452

## Sheet: ElectricityHeatingCooling
Messehallen 4 + 4.1 (conference halls 4 + 4.1)
Usage for entire conference:
electricity	7000	kWh		23.31	kgCO2e		0.02331	tCO2e
heating/cooling	15000	kWh		49.95	kgCO2e		0.04995	tCO2e
			assumptions:	electricity is obtained from Norway (hydro power)
			emission factor	3.33	gCO2e / kWh		*source: https://norsus.no/wp-content/uploads/AR-01.19-The-inventory-and-life-cycle-data-for-Norwegian-hydroelectricity.pdf
				0.00333	kgCO2e / kWh
total in kWh for entire conference:
22000	kWh
Total emissions from electricity and heating/cooling:
73.26	kgCO2e
0.07326	tCO2e
CCB (second conference location)
usage for entire month July:
electricity:	12000	kWh			electricity is obtained from Norway (hydro power)
heating:	5000000	kWh	5000	MWh	emission factor	3.33	gCO2e / kWh		*source: https://norsus.no/wp-content/uploads/AR-01.19-The-inventory-and-life-cycle-data-for-Norwegian-hydroelectricity.pdf
cooling:	58000000	kWh	58000	MWh		0.00333	kgCO2e / kWh
usage for the duration of the conference (5 days)
electricity:	1935.48	kWh		6.44516	kgCO2e		0.00644516	tCO2e
heating:	806452	kWh		2685.48	kgCO2e		2.68548	tCO2e	33.8371
cooling:	9.35484e+06	kWh		31151.6	kgCO2e		31.1516	tCO2e
total in kWh for entire conference:
	1.01632e+07	kWh
Total emissions from electricity and heating/cooling:
33843.5	kgCO2e
33.8435	tCO2e
Total emissions for electricity and heating/cooling in Messehallen and CCB
33.9168	tCO2e

## Sheet: CO2 Emissions total
				Emissions (tCO2)					Assumptions
Transport
Total CO2 emissions for 780 people travelling by airplane				1037.09					distance per attendee = median flying distance from/to their country of residence
Total CO2 emissions for 65 people travelling by car				2.71567		Transport total excl public tranport (tCO2)	1139.75		Total emissions calculated with the mean of all distances travelled by attendees except for attendees from Bremen
Total CO2 emissions for 66 people travelling by train				1.35439		public tranport (tCO2)	1.90044		assumptions: distance < 500 km: 50 % Travel by car, 50 % Travel by train
Total CO2 emissions for public transport during the conference				1.90044					distance > 500 km: Travel by airplane
Total CO2 emissions for late registered participants				98.591					assumption for public transport: 30% of attendees in hotels > 1 km distance + 50 (volunteers, Orga) use public transport, distance used is mean distance of all those hotels
											every attendee that arrived by airplane travels from and to the airport, median distance calculated: airport - central station two ways
Food and drinks
Meals				13.3461					assumed consumption per attendee for the whole duration of the conference:
Ice breaker drinks				0.61805					6 meals (5 lunches, 1 dinner), 2 drinks during Ice breaker, 10 coffees (+milk)
Coffee				75.0339
Milk for coffee				1.6569
Water from 1,5l glass bottles(1,5l per attendee per confe rence day)				3.52683		Food and drinks total (tCO2)	94.1818		Assumed consumption of 1,5l water per attendee on full conference days
Hotel
Emissions for 5 overnight stays per attendee in 3* category				79.261		Hotel total (tCO2)	79.261		Estimated 3* category as mean for in person attendees (minus the attendees coming from Bremen)
Energy
CO2 emissions of water consumption for sanitary use				0.0321397					Estimated 3 WC uses per attendee on full conference days and one at the Icebreaker (30s handwashing inclusive)
CO2 emissions of sewage from sanitary use				0.0390502
CO2 emission electricity MH4 + MH4.1				0.02331
CO2 emissions heating/cooling MH4 + MH4.1				0.04995
CO2 emissions electricity CCB				0.00644516
CO2 emissions heating/cooling CCB				33.8371
CO2 emissions from online attendees				1.98		Energy total (tCO2)	35.968		CO2 from online attendees estimated with the amount of 10kg per attendee from last year
Waste
CO2 emissions from household waste				0.267452		Waste total (tCO2)	0.267452		Estimated 0,150 kg waste from each 0,5 kg meal and 1 napkin per person per meal (lunch, dinner and each coffee break)
Additional items
CO2 emissions for 527 T-Shirts				4.3741
CO2 emissions for print of 1000 conference passes				0.006
CO2 emissions for production of 1000 lanyards				0.0513
						Additional items total (tCO2)	4.4314
Total CO2							1355.76
with 10 % margin							1491.34

## Sheet: Per person
In-person attendance:
Total emissions (tCO2):			Emissions from Online attendance (tCO2)
1355.76			1.98
Total emissions from In-Person event for 1052 in person-attendees
1353.78
Total emissions (tCO2) per in-person attendee
1.28687
